# Supplementary material
Source: PubMed Central journal article supplement (PMC4578813)

Figure S1

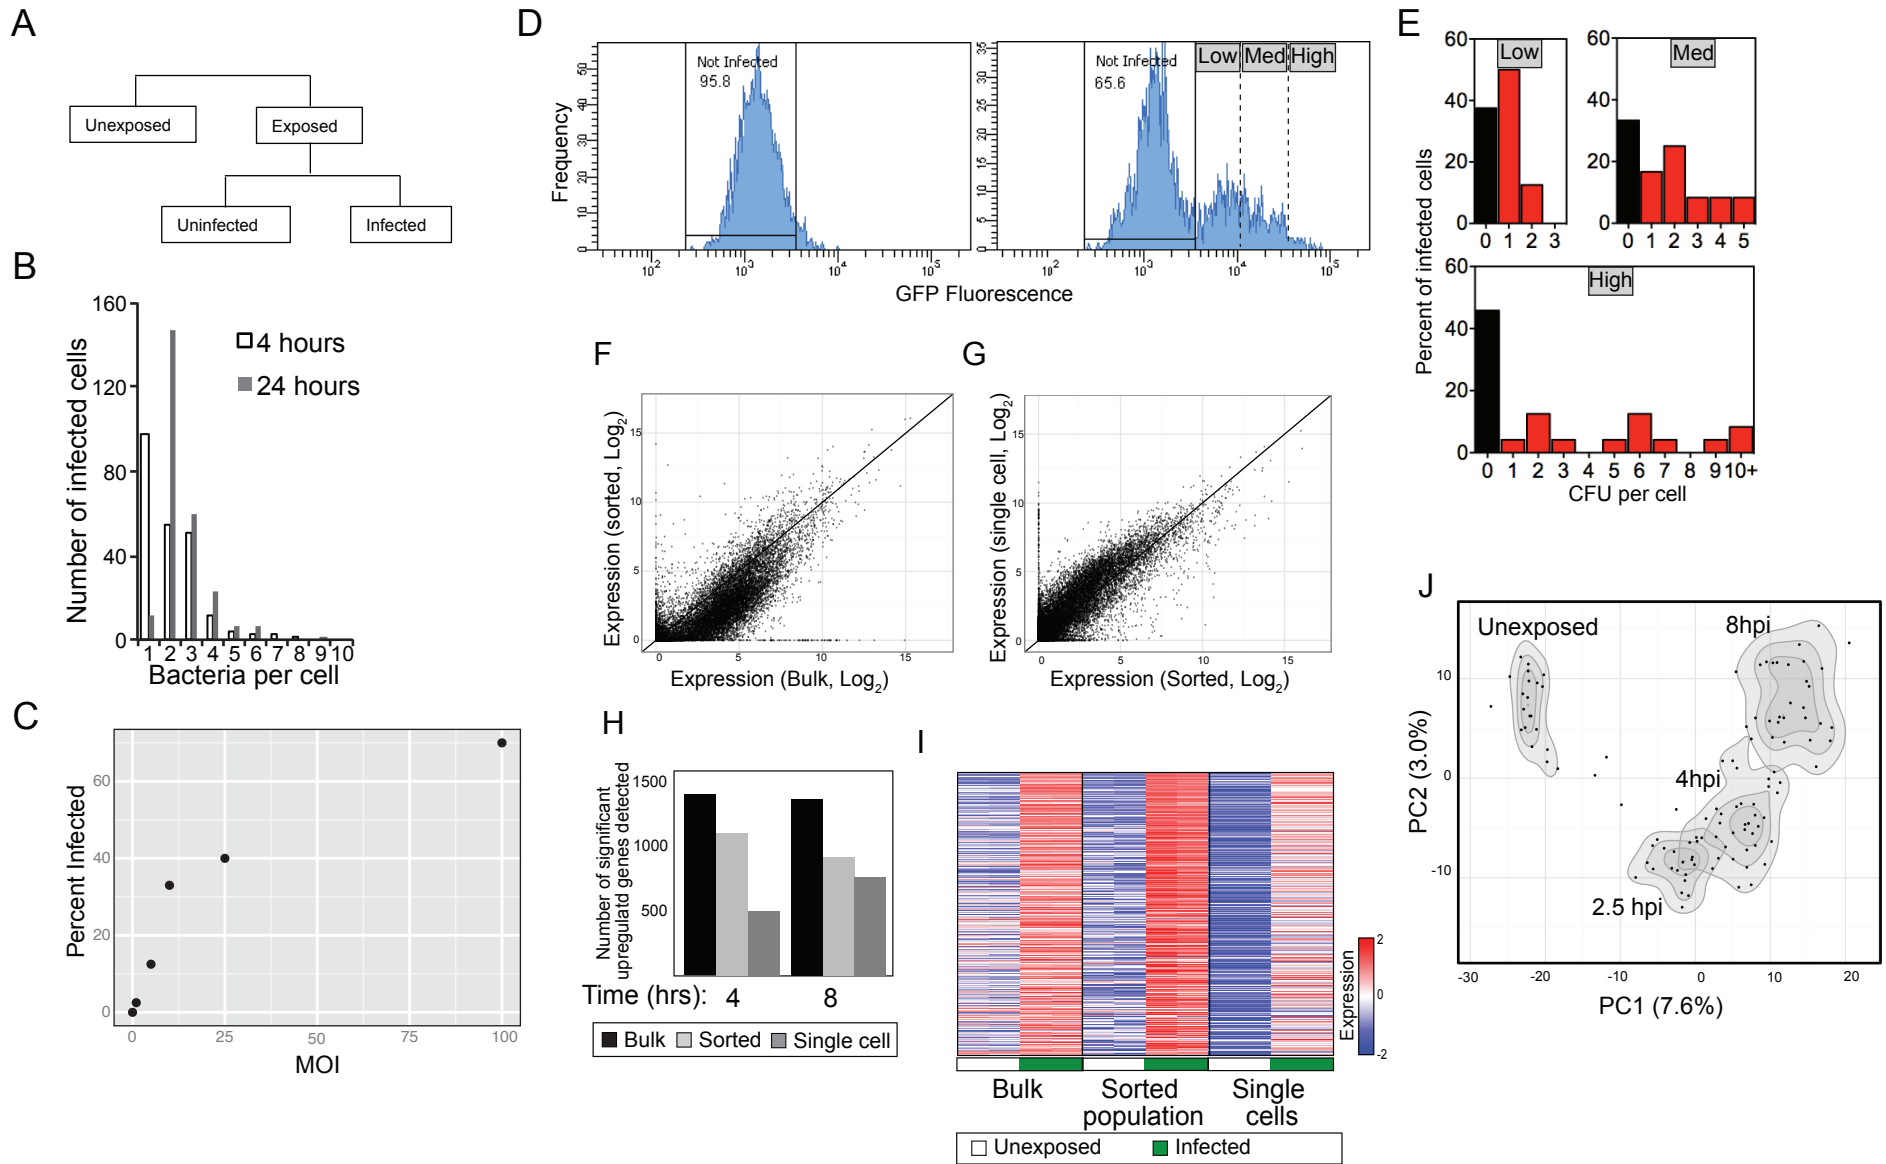

Supplement: NIHMS716530-supplement-1.pdf [file NIHMS716530-supplement-1.pdf]

Figure S2

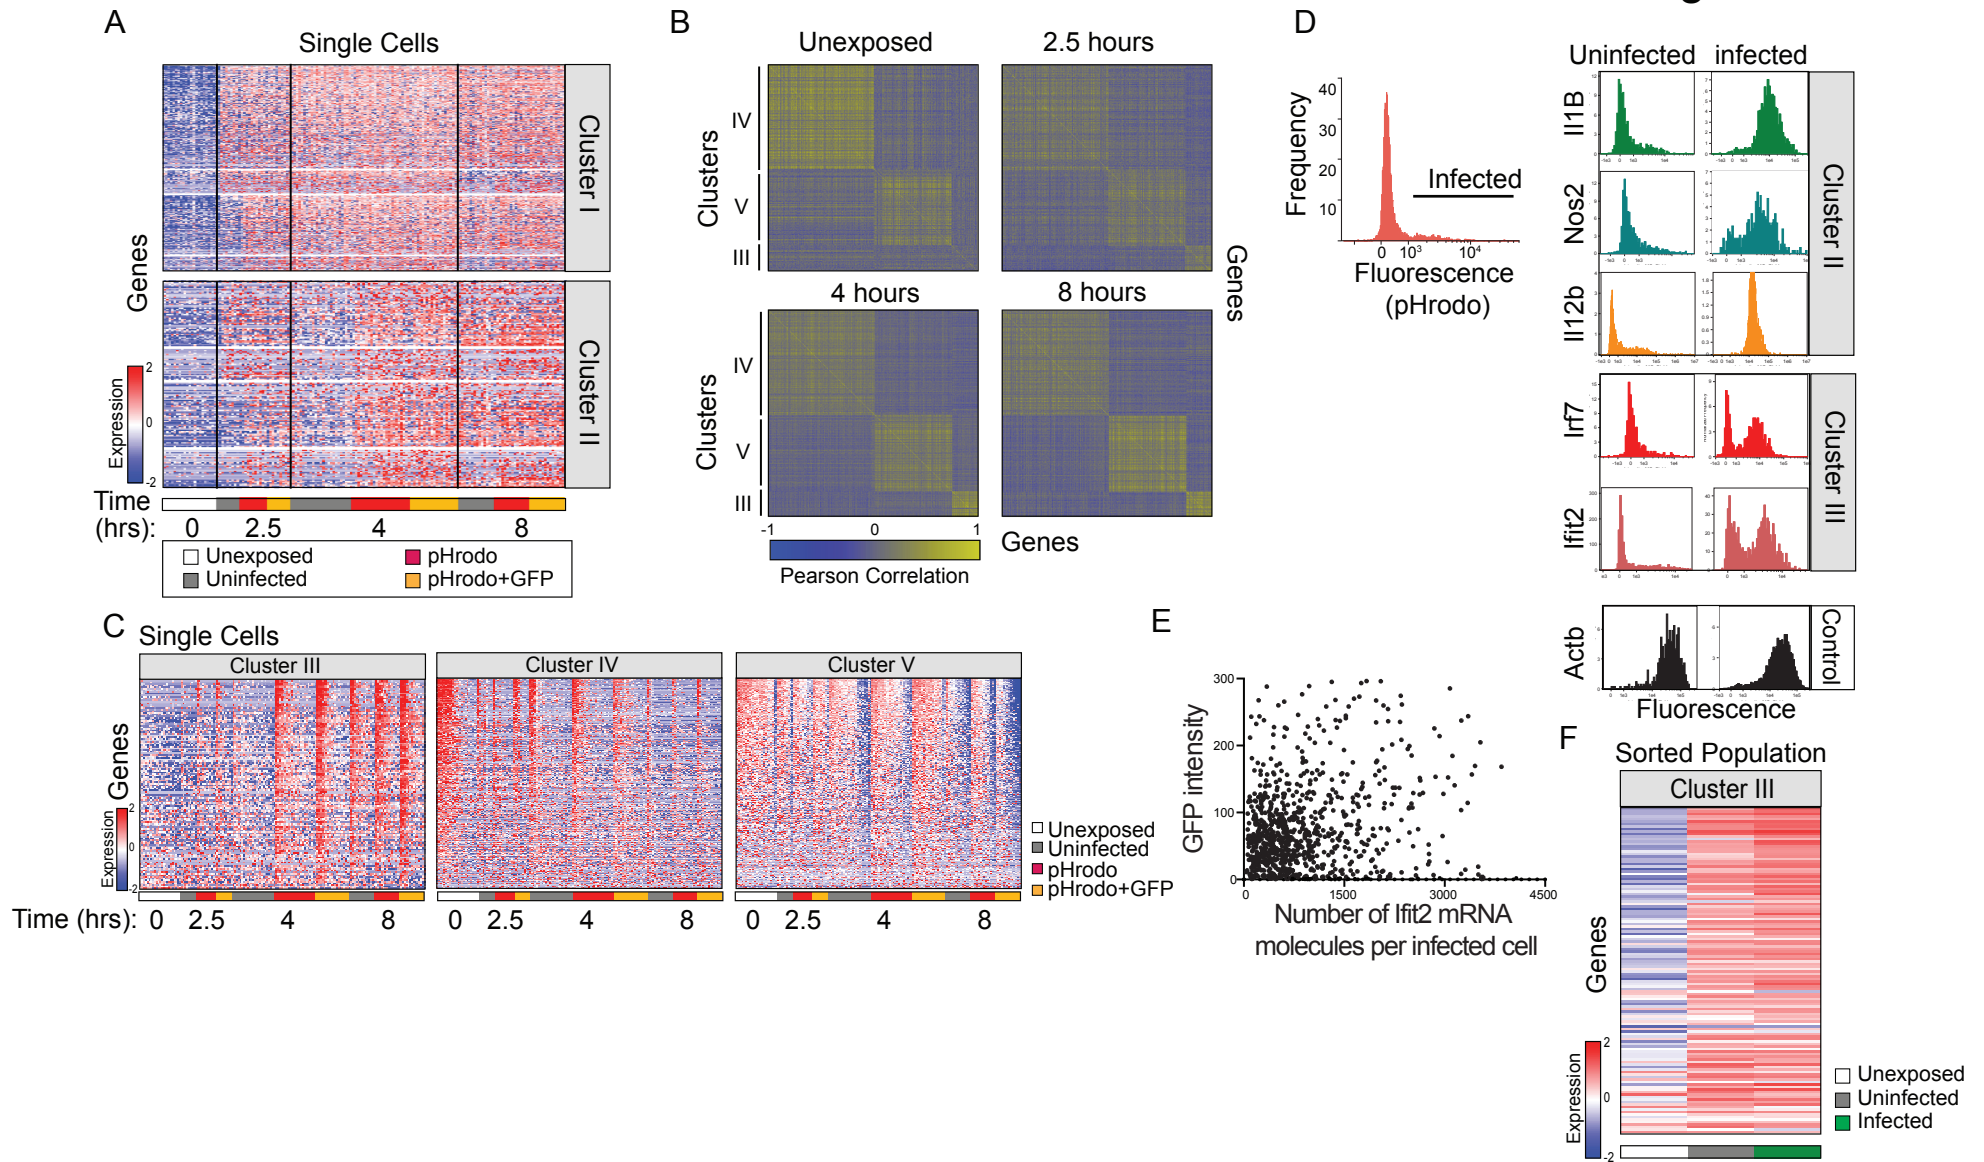

Supplement: NIHMS716530-supplement-2.pdf [file NIHMS716530-supplement-2.pdf]

Figure S3

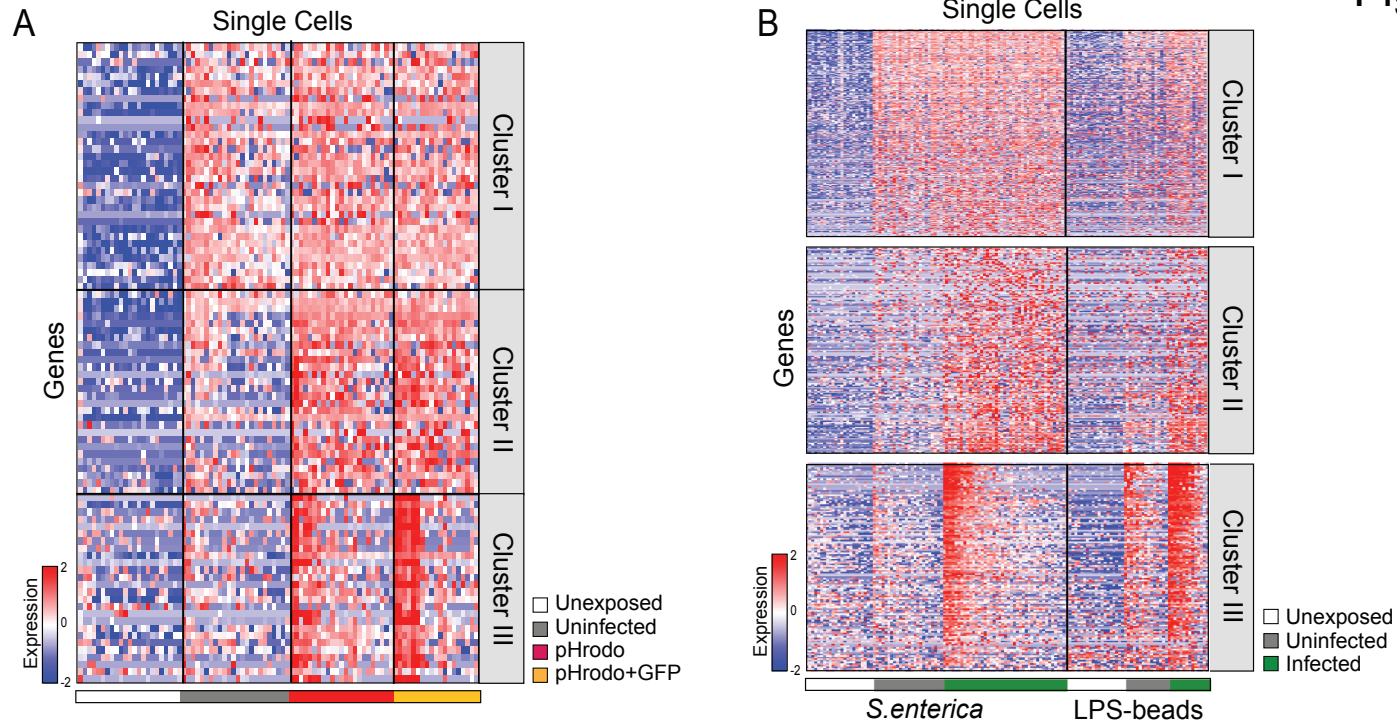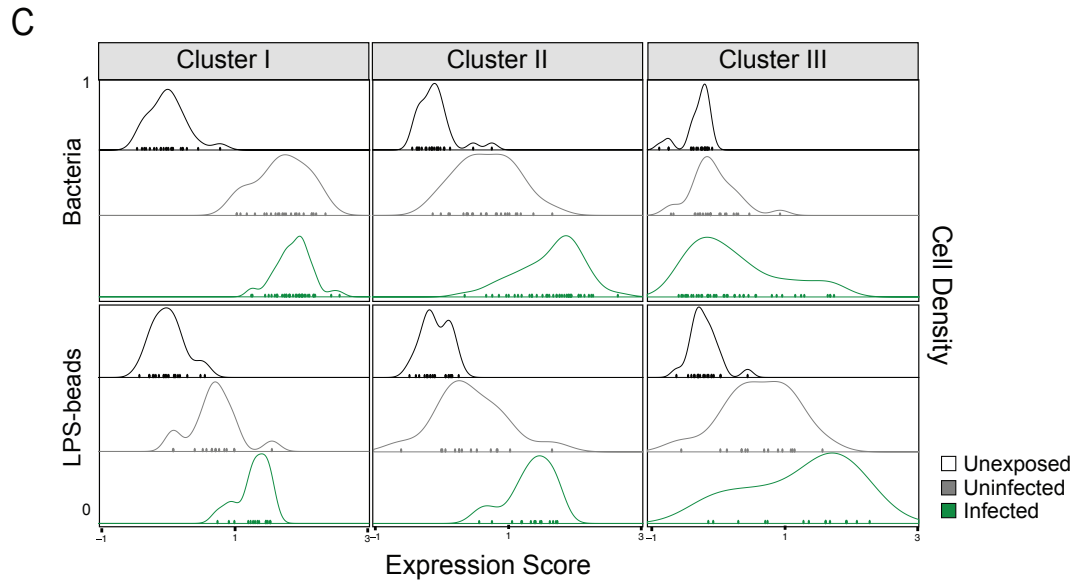

Supplement: NIHMS716530-supplement-3.pdf [file NIHMS716530-supplement-3.pdf]

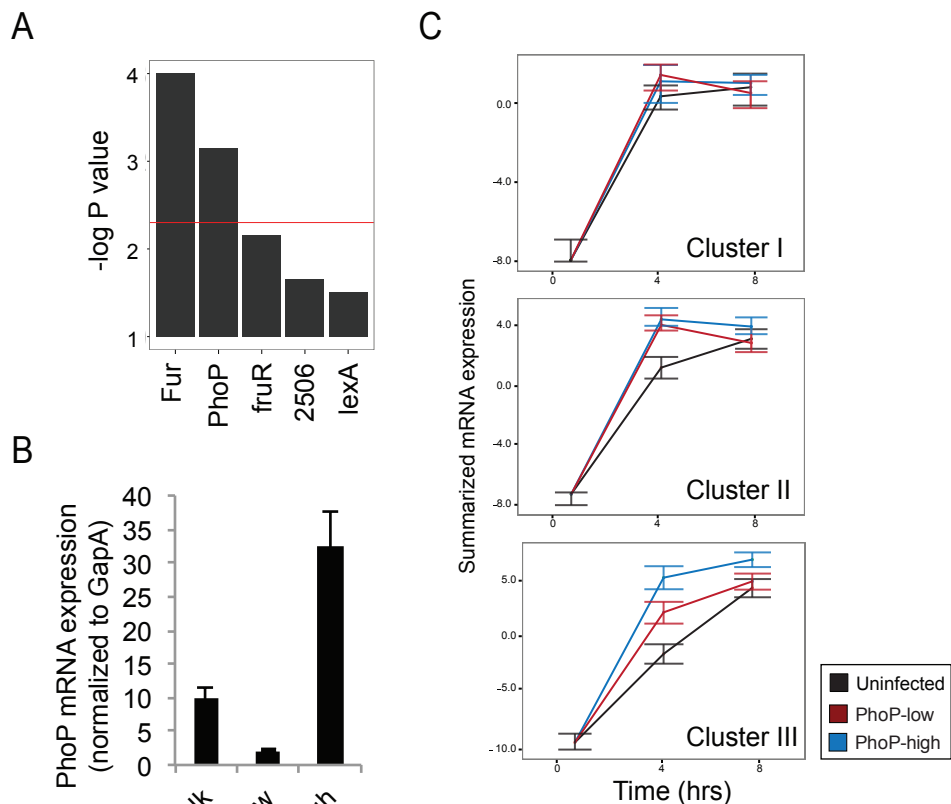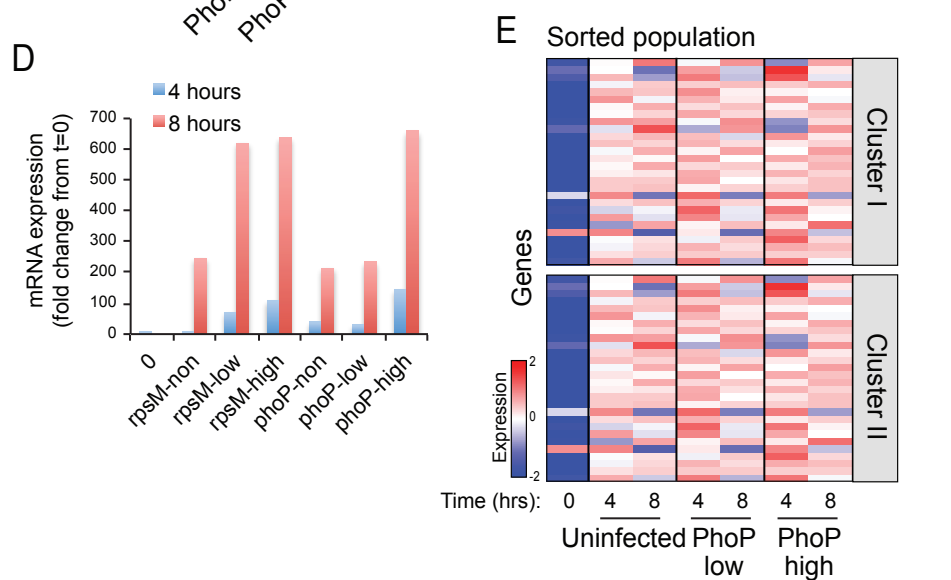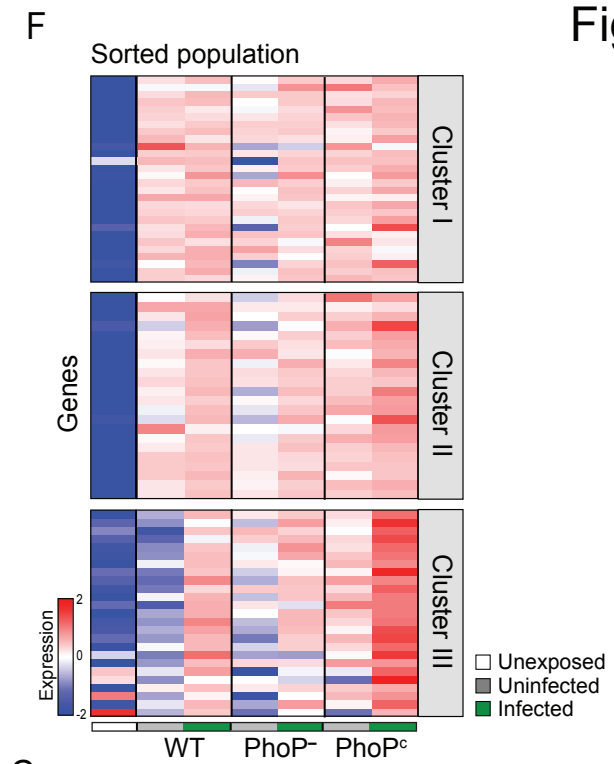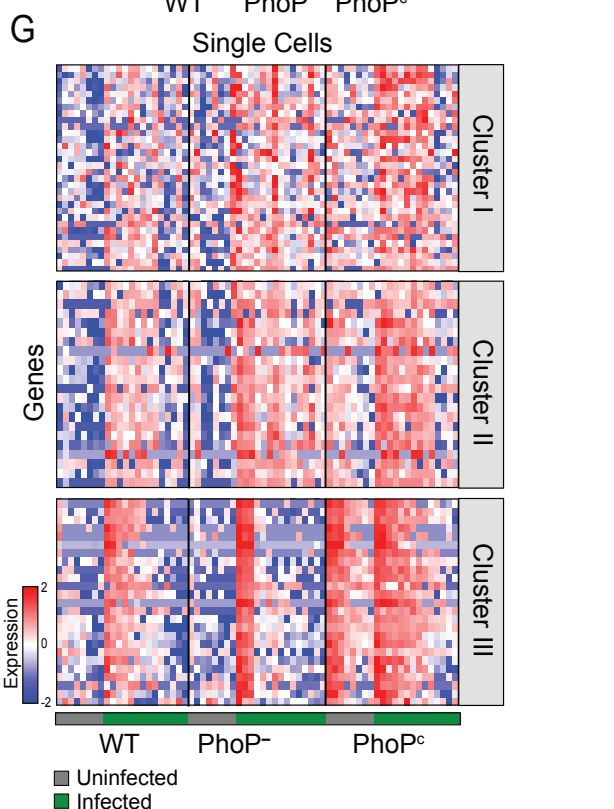

Supplement: NIHMS716530-supplement-4.pdf [file NIHMS716530-supplement-4.pdf]

Figure S6

A

Gating Strategy

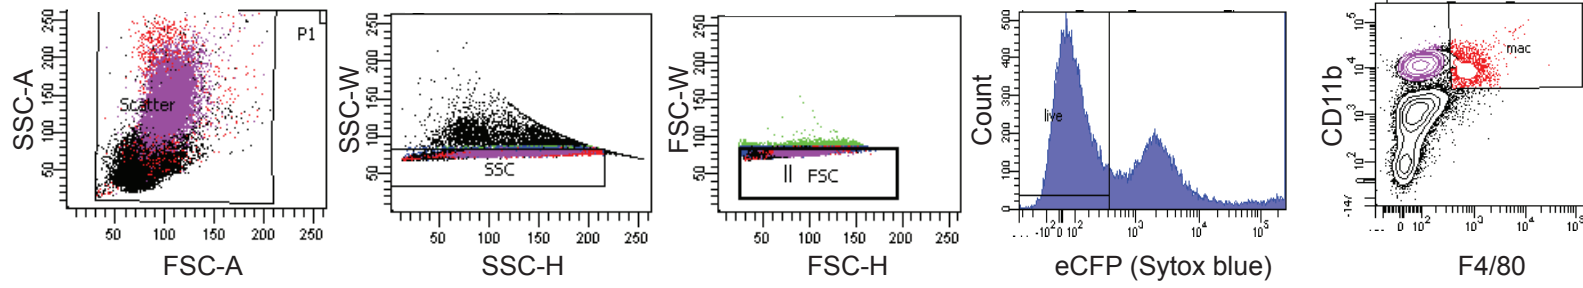

B Sorted Population

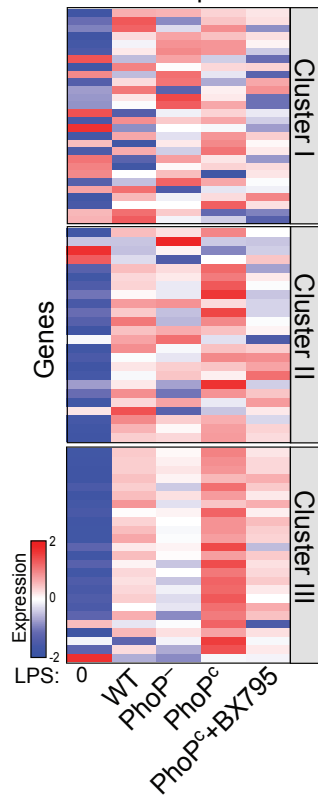

Supplement: NIHMS716530-supplement-5.pdf [file NIHMS716530-supplement-5.pdf]

Figure S5

A

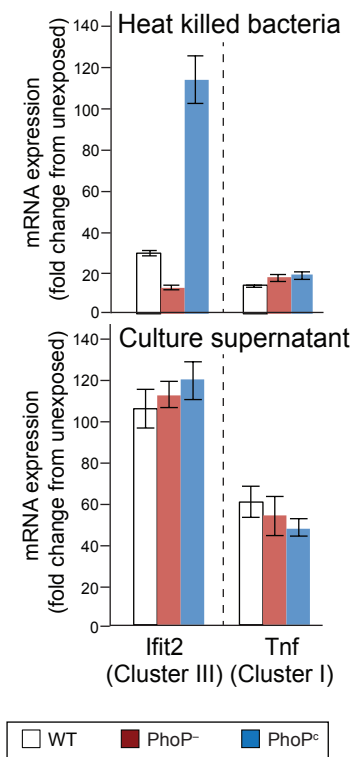

B

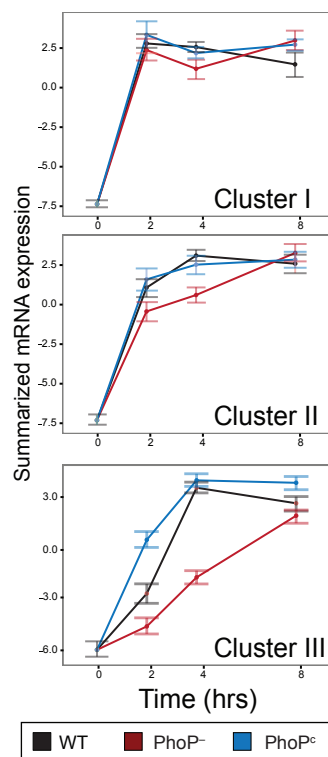

C

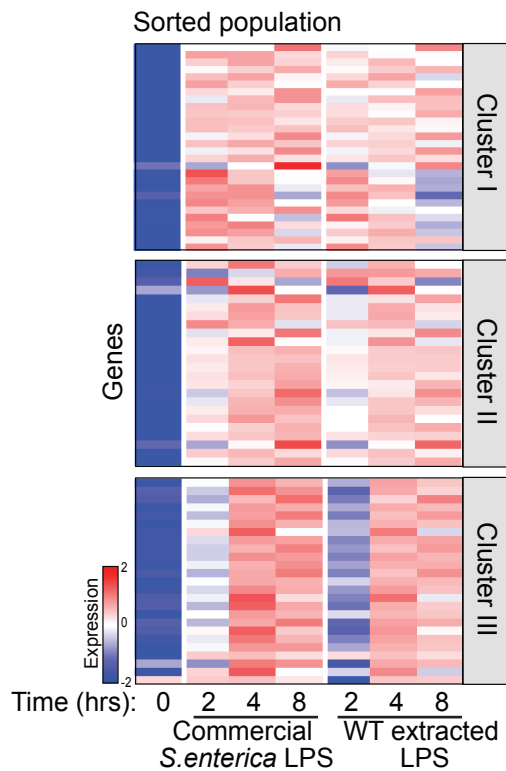

D

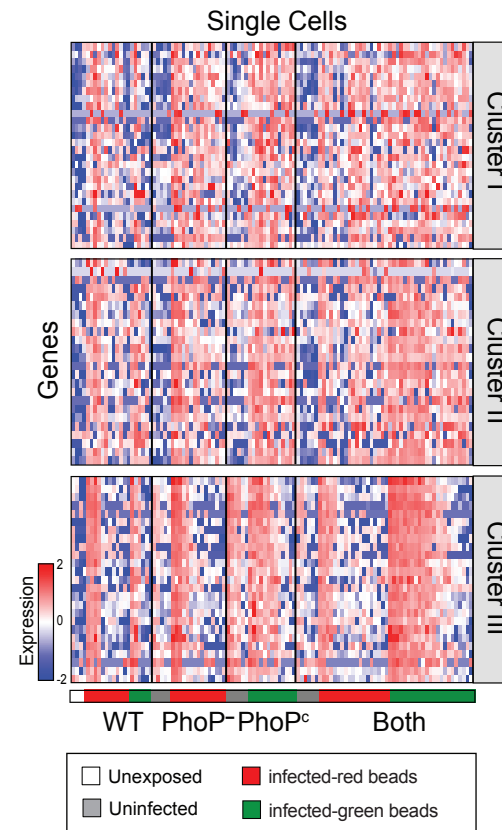

E

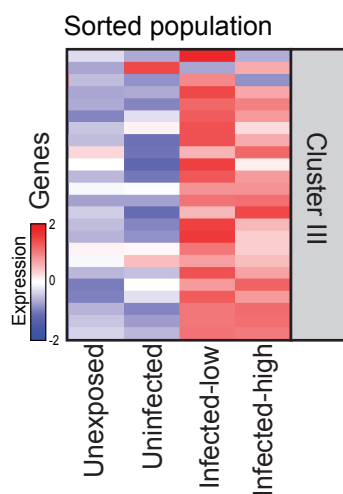

Supplement: NIHMS716530-supplement-6.pdf [file NIHMS716530-supplement-6.pdf]
